# Supplementary material for: Molecular dynamics simulations of PPI dendrimer–drug complexes
Source: Royal Society of Chemistry journal article supplement (doi:10.1039/c3sm50434d), 2013-01-01
Supplement: c3sm50434d.pdf [file c3sm50434d.pdf]

## Supporting Information

### **Molecular Dynamics Simulations of PPI Dendrimer-Drug Complexes**

***Vaibhav Jain,<sup>1</sup> Vishal Maingi,<sup>2</sup> Prabal K. Maiti<sup>2\*</sup> and Prasad V. Bharatam<sup>3\*</sup>***

*<sup>1</sup>Department of Pharmacoinformatics, National Institute of Pharmaceutical Education and Research, Sector 67, S.A.S. Nagar, Punjab 160 062, India*

*<sup>2</sup>Centre for Condensed Matter Theory, Department of Physics, Indian Institute of Science, Bangalore 560 012, India*

*<sup>3</sup>Department of Medicinal Chemistry, National Institute of Pharmaceutical Education and Research, Sector 67, S.A.S. Nagar, Punjab 160 062, India*

#### **S1. Methodology**

##### **S1.1. Building G5 PPI<sup>EDA</sup> dendrimer using DBT**

Dendrimer Builder Toolkit (DBT)<sup>1</sup> in conjunction with AMBER<sup>2</sup> was used to build initial geometry of G5 PPI<sup>EDA</sup> (corresponding to low, neutral and high pH conditions) and G4 PPI<sup>DAB</sup> (corresponding to neutral pH) dendrimers. For building G5 PPI<sup>EDA</sup> dendrimer three residues were selected and named as ‘aaa’ (central core), ‘bbb’ (repeating fragment) and ‘ccc’ (terminal end). The structure of these residues is depicted in Figure S1. The branched Y shape structure of residue ‘bbb’ ensured that it will generate less entangled dendrimer geometry. In each of these residues a cap region was defined (shown in red (‘aaa’), blue (‘bbb’) and green (‘ccc’) regular circles in Figure S1). These capped regions were defined a constrained charge of zero and were removed before joining with the other residues. The atoms encircled in dashed rectangular boxes

represent the joining atoms. Capping atoms were selected in such a way that they mimic the atom types of joining atom and thus charge calculations would be accurate.

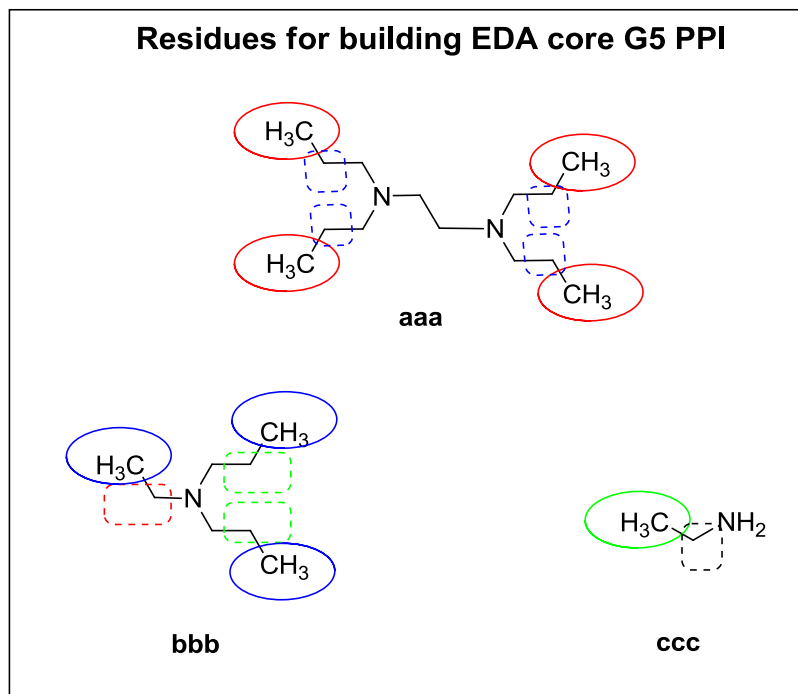

**Figure S1.** Residues selected for building G5 PPI<sup>EDA</sup> dendrimer (Low pH- Full protonation, Neutral pH- 2/3 protonation, High pH- No protonation). Capping atoms defined in residues ‘aaa’, ‘bbb’ and ‘ccc’ are encircled red blue and green respectively. For GAFF atom types and partial atomic RESP charges please refer Table S1, S2 and S3.

All the residues (protonated and non-protonated) with caps were optimized individually using GAUSSIAN09<sup>3</sup> with HF/6-31G(d) as the basis set. During optimization, charges were calculated using ESP method. These optimized structures along with the ESP charges were given as input to the *antechamber* module of AMBER. In the *antechamber*, RESP charges were derived for the residues using two-stage RESP fitting method.<sup>4</sup> During the charge calculation the total charge of the cap atoms were constrained to zero, so that their removal will not affect the overall charge of the residue. For non-protonated residues (high pH), overall charge was set to

zero, while charge for protonated residues 'aaa' was kept +2 and for 'bbb' or 'ccc' +1 charge was assigned. *Antechamber* outputs were exported in *xleap* (another module of AMBER) as .mol2 files. The caps were then removed manually in *xleap* visualizer. De-capped residues so obtained were saved as .lib file (library file) and used further for building dendrimer using DBT. The 3D structure of protonated residues (after decapping) used for dendrimer building is shown in Figure S2. RESP partial atomic charges and GAFF atom types of residues are tabulated Tables S1, S2 and S3. The overall building process for building PPI<sup>EDA</sup> dendrimer is represented in Figure S3. Similar methodology was adopted to build G4<sup>DAB</sup> PPI dendrimer (neutral pH) and residues used for the construction can be seen from our previous work.<sup>1</sup>

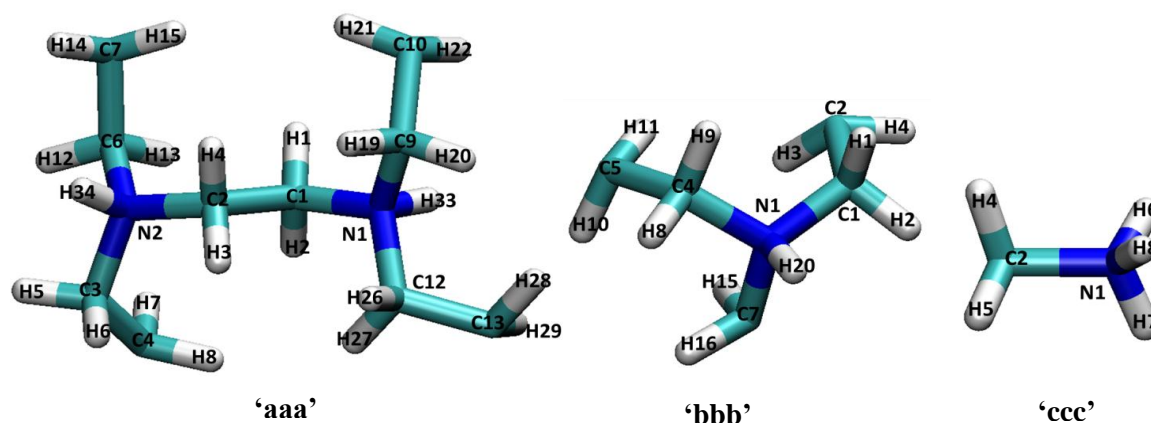

**Figure S2.** 3D structure of protonated residues at low pH 'aaa', 'bbb' and 'ccc' (after decapping) along with the atom numbers used for building G5 PPI<sup>EDA</sup> (Low pH- Full protonation, Neutral pH- 2/3 protonation, High pH- No protonation). For GAFF atom types and RESP partial atomic charges please refer Tables S1, S2 and S3.

**Table S1.** GAFF atom types and RESP partial atomic charges of non-protonated and protonated ‘aaa’ residues used for building G5 PPI<sup>EDA</sup> dendrimer.

| Non-protonated |                |           | Protonated     |                |           |
|----------------|----------------|-----------|----------------|----------------|-----------|
| Atom           | GAFF atom type | Charge    | Atom           | GAFF atom type | Charge    |
| N1             | n3             | -0.471685 | N1             | n4             | -0.080776 |
| C1             | c3             | -0.051977 | C1             | c3             | -0.014373 |
| C2             | c3             | -0.051977 | C2             | c3             | -0.014373 |
| N2             | n3             | -0.471685 | N2             | n4             | -0.080776 |
| C3             | c3             | -0.039478 | C3             | c3             | -0.023921 |
| C4             | c3             | -0.033736 | C4             | c3             | 0.081217  |
| H1             | h1             | 0.103937  | H1             | hx             | 0.065680  |
| H2             | h1             | 0.103937  | H2             | hx             | 0.065680  |
| C6             | c3             | -0.039478 | C6             | c3             | -0.023921 |
| C7             | c3             | -0.033736 | C7             | c3             | 0.081217  |
| H3             | h1             | 0.103937  | H3             | hx             | 0.065680  |
| H4             | h1             | 0.103937  | H4             | hx             | 0.065680  |
| C9             | c3             | -0.039478 | C9             | c3             | -0.023921 |
| C10            | c3             | -0.033736 | C10            | c3             | 0.081217  |
| H5             | h1             | 0.074253  | H5             | hx             | 0.098534  |
| H6             | h1             | 0.074253  | H6             | hx             | 0.098534  |
| C12            | c3             | -0.039478 | C12            | c3             | -0.023921 |
| C13            | c3             | -0.033736 | C13            | c3             | 0.081217  |
| H7             | hc             | 0.041301  | H7             | hc             | 0.042956  |
| H8             | hc             | 0.041301  | H8             | hc             | 0.042956  |
| H12            | h1             | 0.074253  | H12            | hx             | 0.098534  |
| H13            | h1             | 0.074253  | H13            | hx             | 0.098534  |
| H14            | hc             | 0.041301  | H14            | hc             | 0.042956  |
| H15            | hc             | 0.041301  | H15            | hc             | 0.042956  |
| H19            | h1             | 0.074253  | H19            | hx             | 0.098534  |
| H20            | h1             | 0.074253  | H20            | hx             | 0.098534  |
| H21            | hc             | 0.041301  | H21            | hc             | 0.042956  |
| H22            | hc             | 0.041301  | H22            | hc             | 0.042956  |
| H26            | h1             | 0.074253  | H26            | hx             | 0.098534  |
| H27            | h1             | 0.074253  | H27            | hx             | 0.098534  |
| H28            | hc             | 0.041301  | H28            | hc             | 0.042956  |
| H29            | hc             | 0.041301  | H29            | hc             | 0.042956  |
| -              | -              | -         | H33            | hn             | 0.283237  |
| -              | -              | -         | H34            | hn             | 0.283237  |
| <b>Sum (Σ)</b> | -              | 0.000000  | <b>Sum (Σ)</b> | -              | 2.000000  |

**Table S2.** GAFF atom types and RESP partial atomic charges of non-protonated and protonated ‘bbb’ residues used for building G5 PPI<sup>EDA</sup> dendrimer.

| Non-protonated |                |           | Protonated |                |           |
|----------------|----------------|-----------|------------|----------------|-----------|
| Atom           | GAFF atom type | Charge    | Atom       | GAFF atom type | Charge    |
| N1             | n3             | -0.429071 | N1         | n4             | -0.060638 |
| C1             | c3             | -0.043282 | C1         | c3             | -0.090270 |
| C2             | c3             | -0.034265 | C2         | c3             | 0.090620  |
| H1             | h1             | 0.068740  | H1         | hx             | 0.093185  |
| H2             | h1             | 0.068740  | H2         | hx             | 0.093185  |
| C4             | c3             | -0.043282 | C4         | c3             | -0.090270 |
| C5             | c3             | -0.034265 | C5         | c3             | 0.090620  |
| H3             | hc             | 0.040880  | H3         | hc             | 0.034000  |
| H4             | hc             | 0.040880  | H4         | hc             | 0.034000  |
| C7             | c3             | 0.073811  | C7         | c3             | 0.158987  |
| H8             | h1             | 0.068740  | H8         | hx             | 0.093185  |
| H9             | h1             | 0.068740  | H9         | hx             | 0.093185  |
| H10            | hc             | 0.040880  | H10        | hc             | 0.034000  |
| H11            | hc             | 0.040880  | H11        | hc             | 0.034000  |
| H15            | h1             | 0.035937  | H15        | hx             | 0.058204  |
| H16            | h1             | 0.035937  | H16        | hx             | 0.058204  |
| -              | -              | -         | H20        | hn             | 0.275803  |
| Sum (Σ)        | -              | 0.000000  | Sum (Σ)    | -              | 1.000000  |

**Table S3.** GAFF atom types and RESP partial atomic charges of non-protonated and protonated ‘ccc’ residues used for building G5 PPI<sup>EDA</sup> dendrimer.

| Non-protonated |                |           | Protonated |                |           |
|----------------|----------------|-----------|------------|----------------|-----------|
| Atom           | GAFF atom type | Charge    | Atom       | GAFF atom type | Charge    |
| C2             | c3             | 0.181401  | C2         | c3             | 0.298107  |
| H4             | h1             | 0.040898  | H4         | hx             | 0.057331  |
| H5             | h1             | 0.040898  | H5         | hx             | 0.057331  |
| N1             | n3             | -1.037731 | N1         | n4             | -0.413974 |
| H6             | hn             | 0.387267  | H6         | hn             | 0.333735  |
| H7             | hn             | 0.387267  | H7         | hn             | 0.333735  |
| -              | -              | -         | H8         | hn             | 0.333735  |
| Sum (Σ)        | -              | 0.000000  | Sum (Σ)    | -              | 1.000000  |

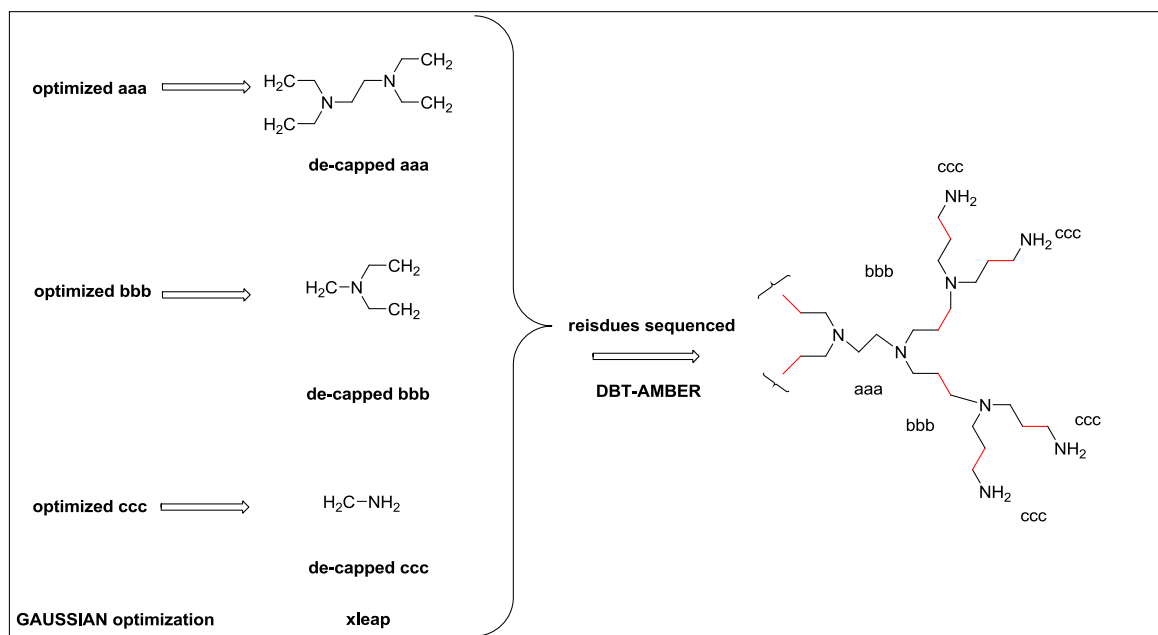

**Figure S3.** Simple logic for building G5 PPI<sup>EDA</sup> dendrimer with DBT (see Figure S1 for 2D structure of ‘aaa’, ‘bbb’, and ‘ccc’). Red bonds indicate the point of attachment for corresponding residues.

## S1.2. Computational details for ligand processing

The 3D structure (see Figure 1, *Main manuscript*) of Famo (CSD Refcode: FOGVIG01), Indo (CSD Refcode: INDMET03) and Pbz (CSD Refcode: JAJKUB) drug molecules were retrieved from Cambridge Structural Database (CSD).<sup>5</sup> As per the  $pK_a$  of Famo (7.1), Indo (5.7) and Pbz (4.5), appropriate charged and uncharged species were considered while forming complexes with dendrimer for simulating at different pH conditions (see Table 2, *Main manuscript*).

In Famo, three protonation sites are possible (Figure S4) and each protonated species can exist in a wide variety of conformations. Thus, to determine the most plausible protonation site

of Famo, *ab initio* geometry optimization calculations were performed on possible sets of protonated drug species and their important conformers. *Ab initio* density functional theory (DFT)<sup>6</sup> calculations were performed using GAUSSIAN09 software package.<sup>3</sup> The gas phase geometry of all the species were fully optimized using B3LYP (Becke3, Lee, Yang, Parr) methods with 6-31+G(d,p) basis sets without any geometrical constraint. In order to understand the energetic behavior of these species in solvent (water), solvent level optimization studies were also performed using the integral equation formalism variant of the polarizable continuum model (IEFPCM) method<sup>7</sup> at 6-31+G(d,p) basis sets. Frequencies were computed analytically for all optimized species at all levels to characterize stationary points as minima or transition states and to estimate the zero point vibrational energies (ZPE). The calculated values (at 298.15K) have been scaled by a factor of 0.9806 for the B3LYP levels.

Electrostatic Potential (ESP) based partial atomic charges of all the drug molecules including their preferred protonated or deprotonated species were derived in GAUSSIAN09<sup>3</sup> with HF/6-31G(d) as the basis set. The output files obtained from the GAUSSIAN were used as an input for the *antechamber* to derive RESP partial atomic charges for the drug molecules. The GAFF atom types and RESP partial atomic charges of drug molecule Famo, Indo and Pbz are presented in Tables S4, S5 and S6 respectively.

**Table S4.** GAFF atom types and RESP partial atomic charges of neutral and protonated states of Famo drug molecule.

| Neutral Famo |                |           | Protonated Famo |                |           |
|--------------|----------------|-----------|-----------------|----------------|-----------|
| Atom         | GAFF atom type | Charge    | Atom            | GAFF atom type | Charge    |
| N1           | nh             | -0.821007 | N1              | nh             | -1.012668 |
| N2           | nh             | -0.821007 | N2              | nh             | -1.012668 |
| C1           | c2             | 0.717625  | C1              | cz             | 0.938289  |
| N3           | ne             | -0.520556 | N3              | nh             | -0.782571 |
| C2           | cc             | 0.385194  | C2              | cc             | 0.605009  |
| N4           | nd             | -0.382988 | N4              | nd             | -0.514127 |
| C3           | cd             | 0.030551  | C3              | cd             | 0.055710  |
| C4           | cc             | -0.091366 | C4              | cc             | -0.200750 |
| S1           | ss             | -0.033102 | S1              | ss             | -0.124857 |
| C5           | c3             | -0.159243 | C5              | c3             | -0.028482 |
| S2           | ss             | -0.349365 | S2              | ss             | -0.370689 |
| C6           | c3             | 0.506852  | C6              | c3             | 0.244122  |
| C7           | c3             | -0.557144 | C7              | c3             | -0.506069 |
| C8           | c2             | 0.579599  | C8              | c2             | 0.564326  |
| N5           | n2             | -0.652408 | N5              | n2             | -0.646810 |
| S3           | s6             | 1.254448  | S3              | s6             | 1.244861  |
| O1           | o              | -0.604057 | O1              | o              | -0.600671 |
| O2           | o              | -0.604057 | O2              | o              | -0.600671 |
| N6           | n3             | -0.955108 | N6              | n3             | -0.939690 |
| N7           | nh             | -0.709279 | N7              | nh             | -0.696957 |
| H1           | hn             | 0.446574  | H1              | hn             | 0.451033  |
| H2           | hn             | 0.446574  | H2              | hn             | 0.451033  |
| H3           | hn             | 0.446574  | H3              | hn             | 0.451033  |
| H4           | hn             | 0.446574  | H4              | hn             | 0.451033  |
| H5           | h4             | 0.264739  | H5              | h4             | 0.257505  |
| H6           | h1             | 0.168534  | H6              | h1             | 0.121865  |
| H7           | h1             | 0.168534  | H7              | h1             | 0.121865  |
| H8           | h1             | -0.047065 | H8              | h1             | 0.042703  |
| H9           | h1             | -0.047065 | H9              | h1             | 0.042703  |
| H10          | hc             | 0.215701  | H10             | hc             | 0.199697  |
| H11          | hc             | 0.215701  | H11             | hc             | 0.199697  |
| H12          | hn             | 0.450811  | H12             | hn             | 0.435196  |
| H13          | hn             | 0.450811  | H13             | hn             | 0.435196  |
| H14          | hn             | 0.368051  | H14             | hn             | 0.362402  |



|                                  |    |          |                                  |    |           |
|----------------------------------|----|----------|----------------------------------|----|-----------|
| H15                              | hn | 0.368051 | H15                              | hn | 0.362402  |
| -                                | -  | -        | H16                              | hn | -1.012668 |
| <b>Sum (<math>\Sigma</math>)</b> | -  | 0.000000 | <b>Sum (<math>\Sigma</math>)</b> | -  | 1.000000  |

**Table S5.** GAFF atom types and RESP partial atomic charges of neutral and anionic states of Indo drug molecule.

| Neutral Indo |                |           | Anionic Indo |                |           |
|--------------|----------------|-----------|--------------|----------------|-----------|
| Atom         | GAFF atom type | Charge    | Atom         | GAFF atom type | Charge    |
| Cl1          | cl             | -0.107488 | Cl1          | cl             | -0.139567 |
| O1           | o              | -0.560135 | O1           | o              | -0.622944 |
| O2           | os             | -0.371077 | O2           | os             | -0.379052 |
| O3           | oh             | -0.669312 | O3           | o              | -0.913166 |
| H1           | ho             | 0.465045  | O4           | o              | -0.913166 |
| O4           | o              | -0.605114 | N1           | n              | -0.227717 |
| N1           | n              | -0.101243 | C1           | cc             | 0.020180  |
| C1           | cc             | 0.010003  | C2           | cd             | 0.054781  |
| C2           | cd             | -0.160688 | C3           | ca             | -0.051806 |
| C3           | ca             | -0.027747 | C4           | ca             | -0.048571 |
| C4           | ca             | -0.163819 | H1           | ha             | 0.125437  |
| H2           | ha             | 0.160331  | C5           | ca             | 0.167337  |
| C5           | ca             | 0.200887  | C6           | ca             | -0.272795 |
| C6           | ca             | -0.213941 | H2           | ha             | 0.157965  |
| H3           | ha             | 0.163054  | C7           | ca             | -0.178724 |
| C7           | ca             | -0.215377 | H3           | ha             | 0.184909  |
| H4           | ha             | 0.199630  | C8           | ca             | -0.018876 |
| C8           | ca             | -0.001627 | C9           | c              | 0.904971  |
| C9           | c              | 0.732414  | C10          | ca             | -0.247295 |
| C10          | ca             | -0.151228 | C11          | ca             | -0.111111 |
| C11          | ca             | -0.142509 | H4           | ha             | 0.134442  |
| H5           | ha             | 0.153300  | C12          | ca             | -0.056987 |
| C12          | ca             | -0.055905 | H5           | ha             | 0.139311  |
| H6           | ha             | 0.144718  | C13          | ca             | -0.008196 |
| C13          | ca             | -0.008403 | C14          | ca             | -0.056987 |
| C14          | ca             | -0.055905 | H6           | ha             | 0.139311  |
| H7           | ha             | 0.144718  | C15          | ca             | -0.111111 |
| C15          | ca             | -0.142509 | H7           | ha             | 0.134442  |

|                  |    |           |                  |    |           |
|------------------|----|-----------|------------------|----|-----------|
| H8               | ha | 0.153300  | C16              | c3 | -0.395031 |
| C16              | c3 | -0.185437 | H8               | hc | 0.146314  |
| H9               | hc | 0.095477  | H9               | hc | 0.146314  |
| H10              | hc | 0.095477  | H10              | hc | 0.146314  |
| H11              | hc | 0.095477  | C17              | c3 | -0.077765 |
| C17              | c3 | 0.046148  | H11              | hc | -0.036256 |
| H12              | hc | 0.035773  | H12              | hc | -0.036256 |
| H13              | hc | 0.035773  | C18              | c  | 1.072579  |
| C18              | c  | 0.760639  | C19              | c3 | 0.024589  |
| C19              | c3 | 0.040267  | H13              | h1 | 0.068061  |
| H14              | h1 | 0.069011  | H14              | h1 | 0.068061  |
| H15              | h1 | 0.069011  | H15              | h1 | 0.068061  |
| H16              | h1 | 0.069011  |                  |    | -0.139567 |
| Sum ( $\Sigma$ ) | -  | 0.000000  | Sum ( $\Sigma$ ) | -  | -1.000000 |

**Table S6.** GAFF atom types and RESP partial atomic charges of anionic Pbz drug molecule.

| Anionic Pbz |                   |           |
|-------------|-------------------|-----------|
| Atom        | GAFF<br>atom type | Charge    |
| N1          | n                 | -0.345193 |
| C1          | cc                | 0.724099  |
| C2          | cd                | -0.553430 |
| C3          | c                 | 0.724099  |
| N2          | n                 | -0.345193 |
| C4          | c3                | -0.057613 |
| C5          | c3                | 0.046309  |
| C6          | c3                | 0.090290  |
| C7          | c3                | -0.068746 |
| O1          | o                 | -0.675647 |
| O2          | o                 | -0.675647 |
| C8          | ca                | 0.229478  |
| C9          | ca                | -0.090548 |
| C10         | ca                | -0.242984 |
| C11         | ca                | -0.145122 |
| C12         | ca                | -0.242984 |
| C13         | ca                | -0.090548 |
| C14         | ca                | 0.229478  |
| C15         | ca                | -0.090548 |

|                                  |    |           |
|----------------------------------|----|-----------|
| C16                              | ca | -0.242984 |
| C17                              | ca | -0.145122 |
| C18                              | ca | -0.242984 |
| C19                              | ca | -0.090548 |
| H1                               | hc | 0.031560  |
| H2                               | hc | 0.031560  |
| H3                               | hc | 0.004671  |
| H4                               | hc | 0.004671  |
| H5                               | hc | -0.028104 |
| H6                               | hc | -0.028104 |
| H7                               | hc | -0.004878 |
| H8                               | hc | -0.004878 |
| H9                               | hc | -0.004878 |
| H10                              | ha | 0.119260  |
| H11                              | ha | 0.146367  |
| H12                              | ha | 0.118980  |
| H13                              | ha | 0.146367  |
| H14                              | ha | 0.119260  |
| H15                              | ha | 0.119260  |
| H16                              | ha | 0.146367  |
| H17                              | ha | 0.118980  |
| H18                              | ha | 0.146367  |
| H19                              | ha | 0.119260  |
| <b>Sum (<math>\Sigma</math>)</b> | -  | -1.000000 |

### S1.3. Molecular docking

From the trajectories of MDs obtained for G5 PPI<sup>EDA</sup> at different pH, representative equilibrated structure of dendrimers were extracted and used further for preparing corresponding drug-dendrimer complexes. In order to encapsulate drug inside the dendrimer, molecular docking approach was implemented using AUTODOCK 4.2 software.<sup>8</sup> Dendrimer and ligand molecules with RESP partial atomic charges were used in Autodock. Non polar hydrogens were not allowed to merge. For Indo and Pbz all the active torsions were allowed to rotate during docking, while in case of Famo, all the rotatable bonds except the bond between thiazole ring and

guanidine group were defined as active torsions for docking. This torsion angle was constrained in order to maintain the intramolecular hydrogen bonding between thiazole ring nitrogen and guanidine amino group.

The grid box was defined at the centre of macromolecule with 0.375 Å spacing and having 40 x 40 x 40 grid points in x, y and z direction respectively. The grid dimensions were large enough to cover the cavities around the central core ('aaa', Figure S2). Grid maps for dendrimer and drug molecule were generated with the help of auxiliary programme AutoGrid. Lamarckian genetic algorithm (GA)<sup>9</sup> was used for the purpose of docking. After implementing the above methodology a total of eight dendrimer–drug complexes (Table 3, *Main manuscript*) were obtained (G5 PPI<sup>EDA</sup>-Famo and G5 PPI<sup>EDA</sup>-Indo under three different pH conditions (low, neutral and high); G3 PAMAM-Pbz and G4 PPI<sup>DAB</sup>-Pbz at neutral pH). The resulting molecular assemblies were taken up further for the simulation in AMBER.

#### S1.4. MM-PBSA Binding Free Energy Calculations

The molecular mechanical energies were calculated by *anal* program of AMBER 10. The Poisson Boltzmann solvation energies were calculated with the *pbsa* program of AMBER 10 using a grid spacing of 2 Å, dielectric constant for solute and solvent 1 and 80 respectively. For the calculation of nonpolar contributions, the solvent accessible surface area was calculated with *MSMS* program<sup>10</sup> of AMBER 10, by taking the solvent probe as 1.4 Å and the values for  $\gamma$  and  $\beta$  were set to 0.0072 kcal/mol/Å<sup>2</sup> and 0.0 kcal/mol respectively.

## S2. Results and Discussion

### S2.1. Quantum chemical analysis of Famotidine (Famo)

At different pH, Famo drug molecule ( $pK_a = 7.1$ ) can either exist in neutral or protonated form (pH 4 - protonated, pH 7.4 & 10 - neutral). Three protonation sites are possible in Famo as shown in Figure S4. The crystal structure of neutral (CSD Refcode: FOGVIG01) as well as protonated form (CSD Refcode: JATLOF, Famotidine hydrochloride) of Famo is available in CSD. In the protonated form, protonation is reported at the guanidine nitrogen atom attached to thiazole ring. Moreover in the crystal structures, an intramolecular hydrogen bonding between the guanidine amino group and ring nitrogen of thiazole moiety has also been observed.

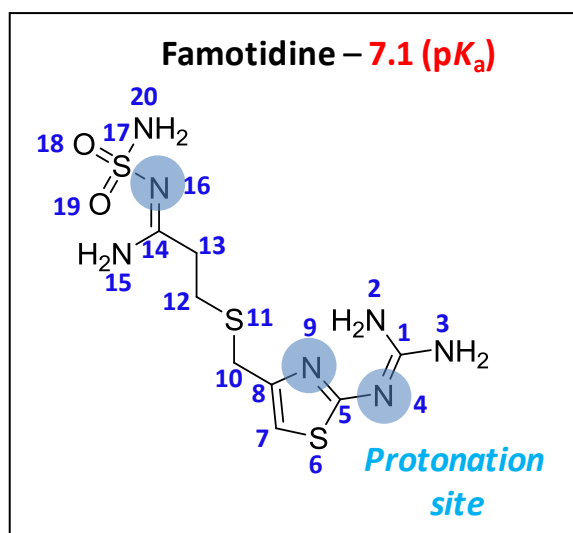

**Figure S4.** 2D structure of Famotidine (Famo) along with atom numbering and possible sites of protonation.

In order to identify most preferred protonation site of Famo, three different protonated species were considered along with their important conformers. All of them were optimized at

B3LYP/6-31+G(d,p) level in gaseous as well as in solvent phase (water, IEFPCM method) conditions using GAU09 software. After full optimization, they were named as **Famo-H1** (protonation at N4), **Famo-H2** (protonation at N9) and **Famo-H3** (protonation at N14), while their corresponding rotamers (obtained after rotating C1-N4-C5-N9 torsion angle to 180°) were designated as **Famo-H1rot**, **Famo-H2rot** and **Famo-H3rot**. The 3D structure of these protonated species after optimization in solvent phase are depicted in Figure S5 and the relative energies of these species in gaseous as well as solvent phase are presented in Table S7. In all the structures intramolecular hydrogen bonding N15-H...O19 was observed, while in all the rotamers weak intramolecular interaction N2-H...S6 was also seen in addition.

In gas phase, the most stable structure **Famo-H2rot** is stabilized by the intramolecular hydrogen bonding C7-H...O18 in addition to above mentioned interactions. **Famo-H3rot** was found to be energetically the least favourable structure by about 21.61 kcal/mol on a relative energy scale. Likewise, **Famo-H3** and **Famo-H1rot** were less stable by ~14 kcal/mol. In case of **Famo-H3** and **Famo-H3rot**, the extended conformation of sulfamoylpropanamidine side chain was observed (as compared to bent conformations in all other structures) due to which hydrogen bonding C7-H...O18 gets broken. Thus the possibilities of these two structures are ruled out. In case of **Famo-H2**, due to the protonation at ring nitrogen of thiazole moiety (N9), hydrogen-hydrogen repulsion and twisting of guanidine side chain occurs that leads to abolish the intramolecular hydrogen bonding with guanidine N2H. But still **Famo-H2** is more stable than **Famo-H1** by about 2.08 kcal/mol which showed strong intramolecular hydrogen bonding N2-H...N. In order to obtain more accurate results mimicking experimental conditions, solvent phase optimization calculations in water were performed on all the protonated structures. After full optimization in solvent phase, **Famo-H1** and **Famo-H2rot** becomes almost isoenergetic,

whereas **Famo-H3rot** was again turned out to be the least stable structure ( $\sim 15.74$  kcal/mol). In agreement with X-ray diffraction and  $^1\text{H}$  NMR studies,<sup>11</sup> the most stable structure **Famo-H1** maintains the strong hydrogen bond anchoring the guanidine chain in the same plane as the thiazole ring. Due to this co-planarity, conjugation of guanidine with the thiazole ring was observed, while in all the rotamers the communication of atomic arrangement is missing as they all are out of plane. Since, implicit solvent phase optimization studies reflects the more realistic picture, thus the result obtained herewith was considered for assigning the most plausible protonation site of Famo. Finally, **Famo-H1** was considered as the correct representation of the protonated species and used further for the complexation with dendrimer and simulation at low pH. The results obtained in this study are in concurrence with the semi-empirical calculations performed by Olea-Azar and Parra-Mouchet<sup>12</sup> on Famo and its analogues. Moreover, recently reported NMR-pH titration study on Famo drug molecule also corroborate our observation.<sup>13</sup>

**Table S7.** Relative energies (kcal/mol) of possible protonated species of Famo drug molecule after optimization in gaseous as well as in solvent phase at B3LYP-6-31+G(d) level.

| Name              | Relative energies (kcal/mol)<br>B3LYP/6-31+G(d,p) |                                  |
|-------------------|---------------------------------------------------|----------------------------------|
|                   | Gas phase                                         | Solvent phase<br>(water, IEFPCM) |
| <b>Famo-H1</b>    | 6.16                                              | 0.00                             |
| <b>Famo-H2</b>    | 4.08                                              | 2.38                             |
| <b>Famo-H3</b>    | 14.56                                             | 10.29                            |
| <b>Famo-H1rot</b> | 14.32                                             | 5.43                             |
| <b>Famo-H2rot</b> | 0.00                                              | 0.05                             |
| <b>Famo-H3rot</b> | 21.61                                             | 15.74                            |

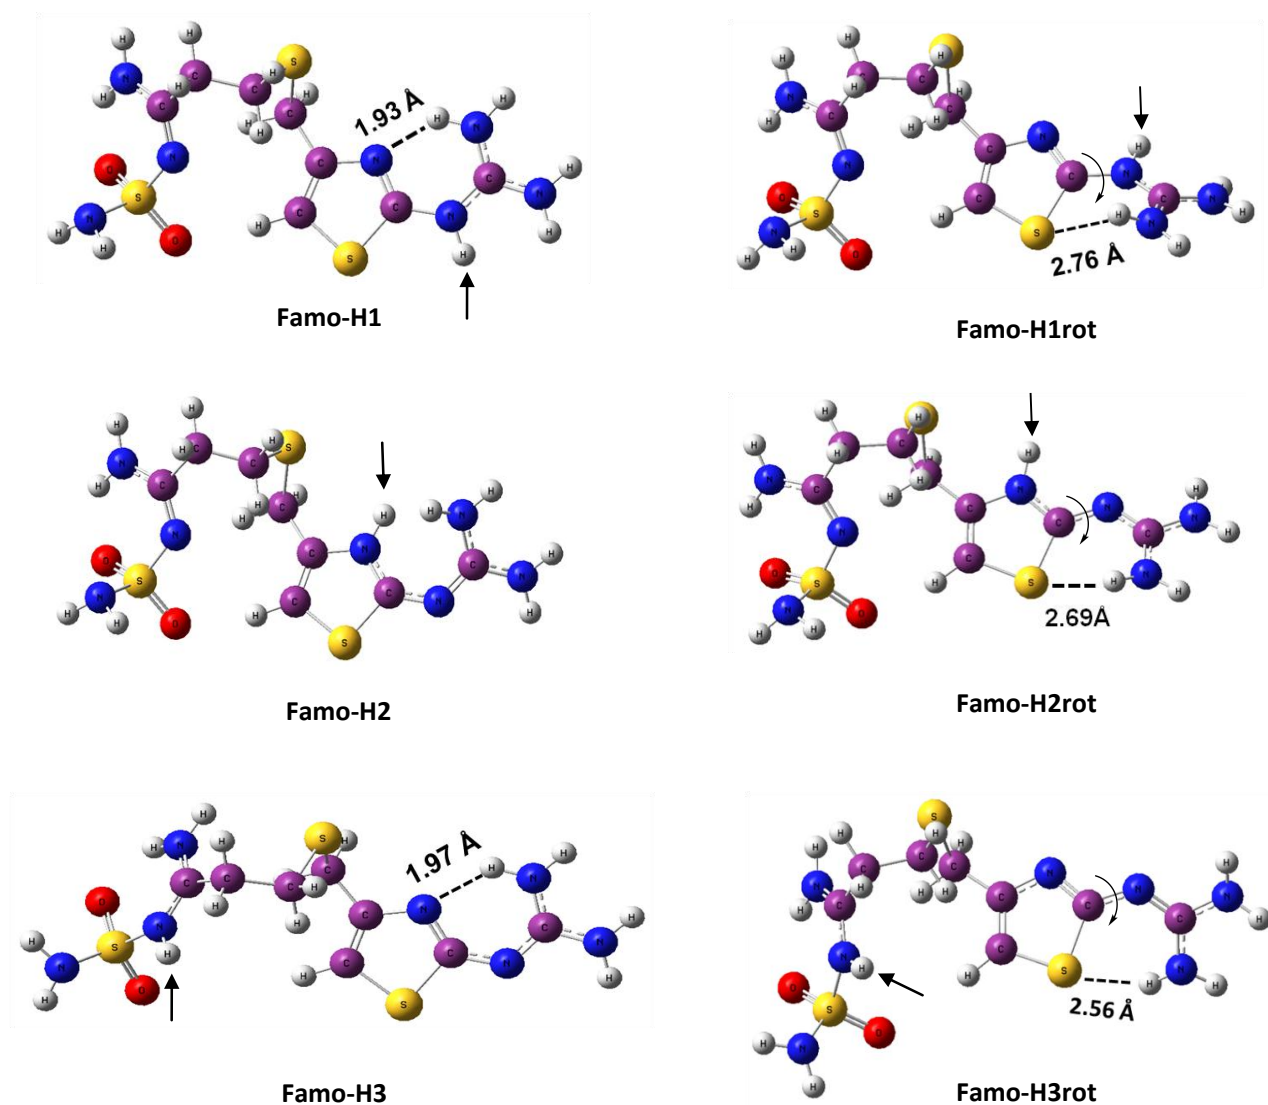

**Figure S5.** B3LYP-6-31+G(d) optimized geometries (solvent phase) of various protonated species of Famo drug molecule. Black arrow indicates the site of protonation considered.



## S2.2. Hydrogen bond analysis between peripheral amines (ccc residue) and water

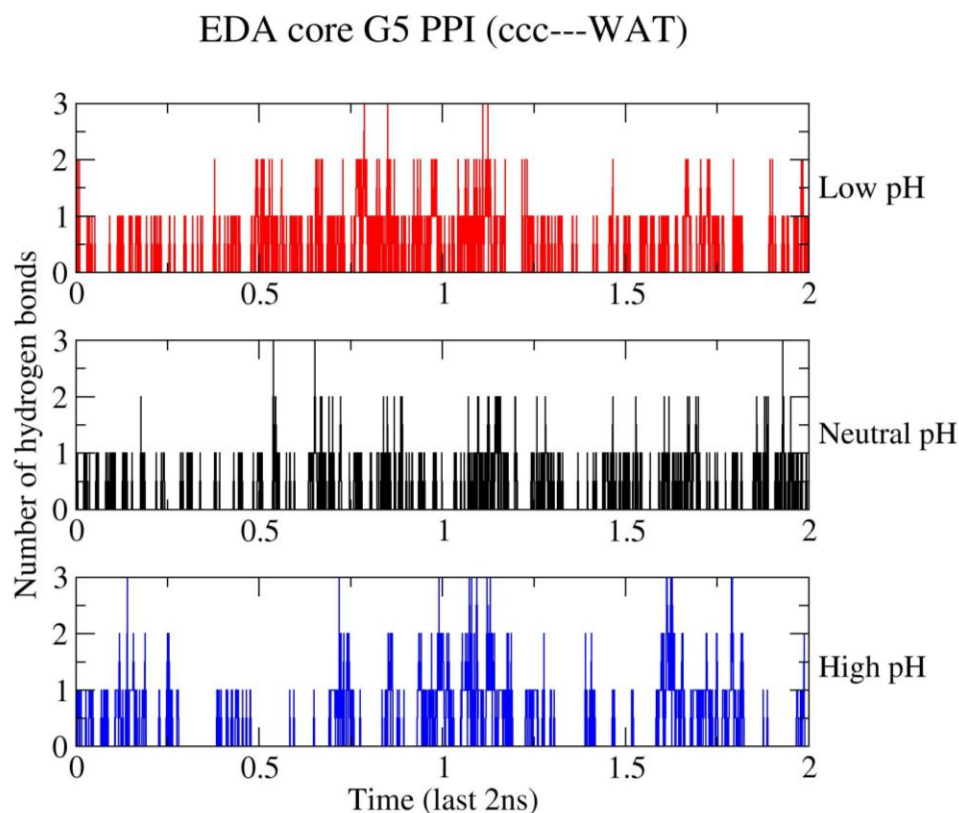

**Figure S6.** Number of hydrogen bonds formed between terminal primary amines (ccc) of G5 PPI<sup>EDA</sup> and water molecules at low, neutral and high pH conditions (analysis was performed on the last 2 ns or 2000 snapshots of the total simulation run). For calculating hydrogen bonds, angle and distance cutoff was set to 120° and 3.0 Å respectively.

## 2.3. Molecular Dynamics Simulation Analysis of Dendrimer-Drug Complexes

### (a) G5 PPI<sup>EDA</sup>-Famo (Low pH)

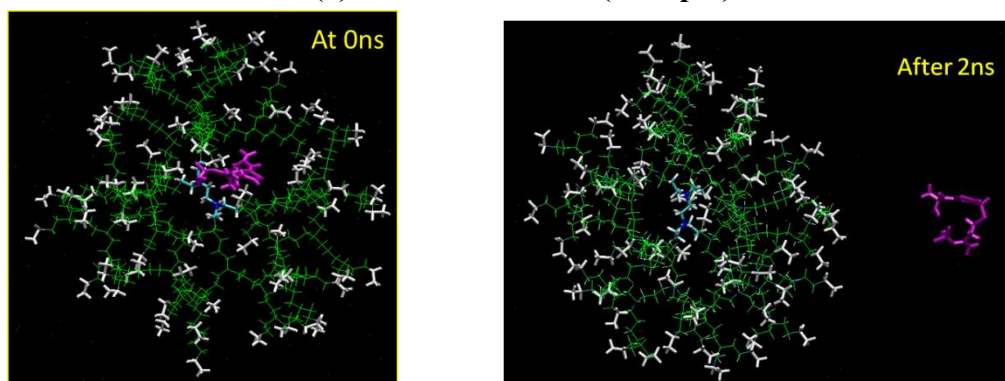

### (b) G5 PPI<sup>EDA</sup>-Famo (Neutral pH)

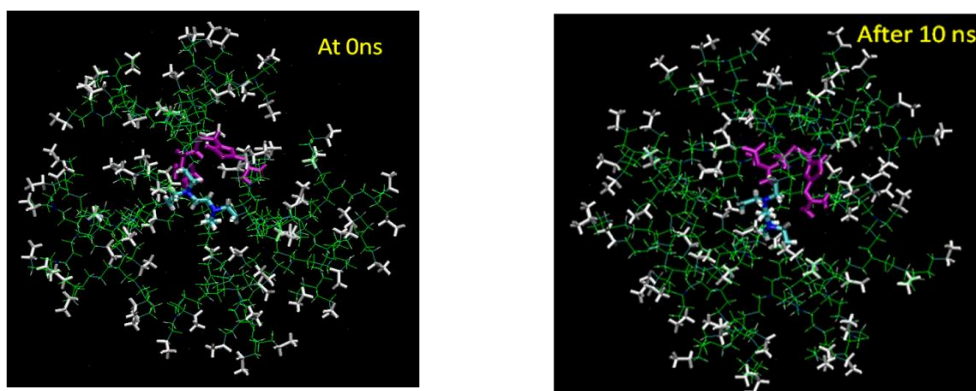

### (c) G5 PPI<sup>EDA</sup>-Famo (High pH)

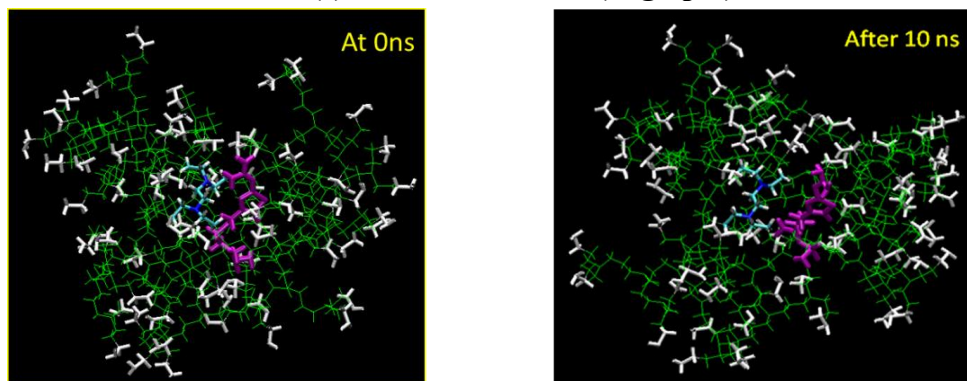

**Figure S7.** Snapshots of G5 PPI<sup>EDA</sup>-Famo complex during different time intervals of MD simulation run at various pH conditions (a) low pH (b) neutral pH and (c) high pH. Colour coding and molecule/fragment representation is as follows: *Magenta sticks* – Famo; *Blue and cyan sticks* – core (‘aaa’ residue); *Green lines* – repeating fragments (‘bbb’ residue); *White sticks* –terminal amino groups (‘ccc’ residue).

(a) G5 PPI<sup>EDA</sup>-Indo (Low pH)

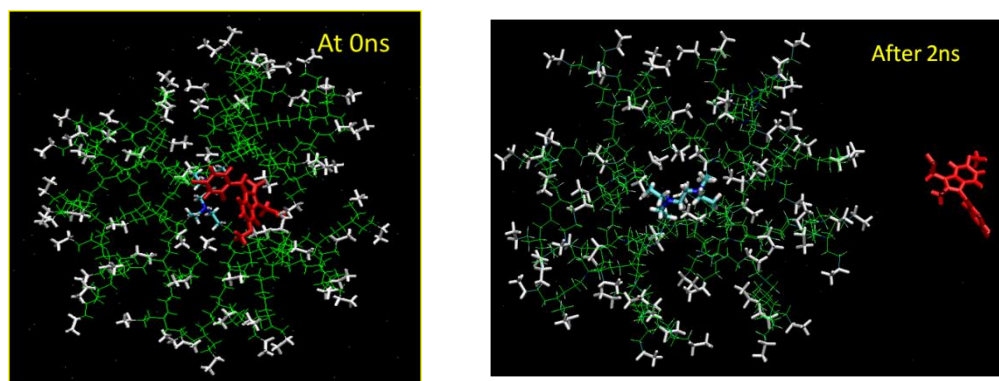

(b) G5 PPI<sup>EDA</sup>-Indo (Neutral pH)

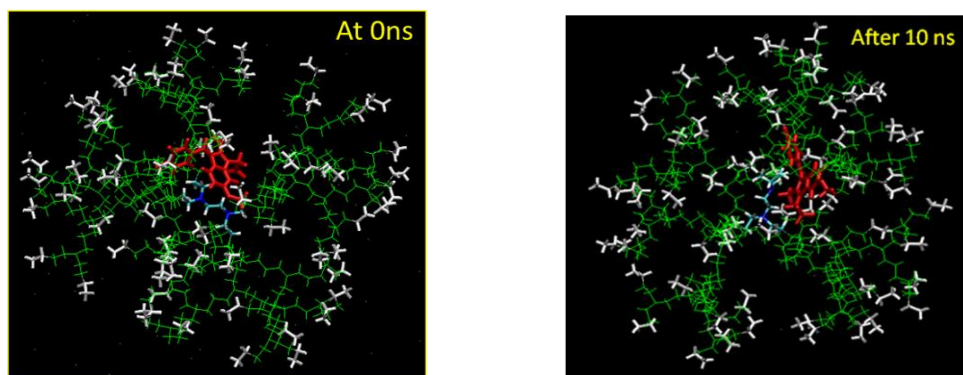

(c) G5 PPI<sup>EDA</sup>-Indo (High pH)

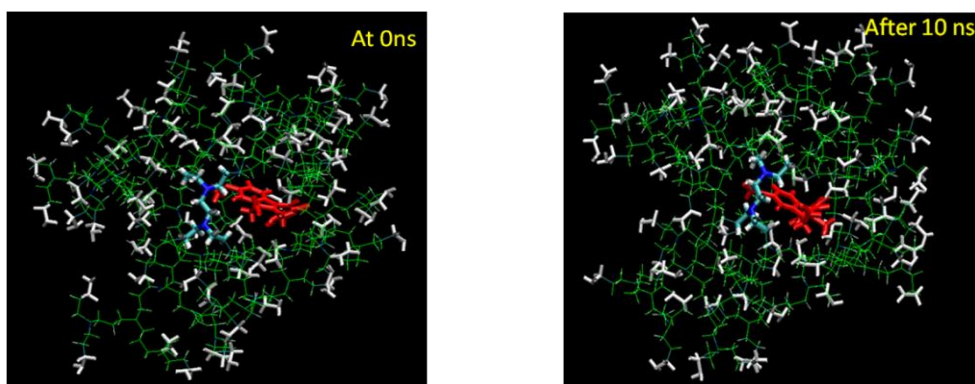

**Figure S8.** Snapshots of G5 PPI<sup>EDA</sup>-Indo complex during different time intervals of MD simulation run at various pH conditions (a) low pH (b) neutral pH and (c) high pH. Colour coding and molecule/fragment representation is as follows: *Red sticks* – Indo; *Blue and cyan sticks* – core ('aaa' residue); *Green lines* – repeating fragments ('bbb' residue); *White sticks* – terminal amino groups ('ccc' residue).

## 2.4. MM-PBSA Binding Free Energy Analysis

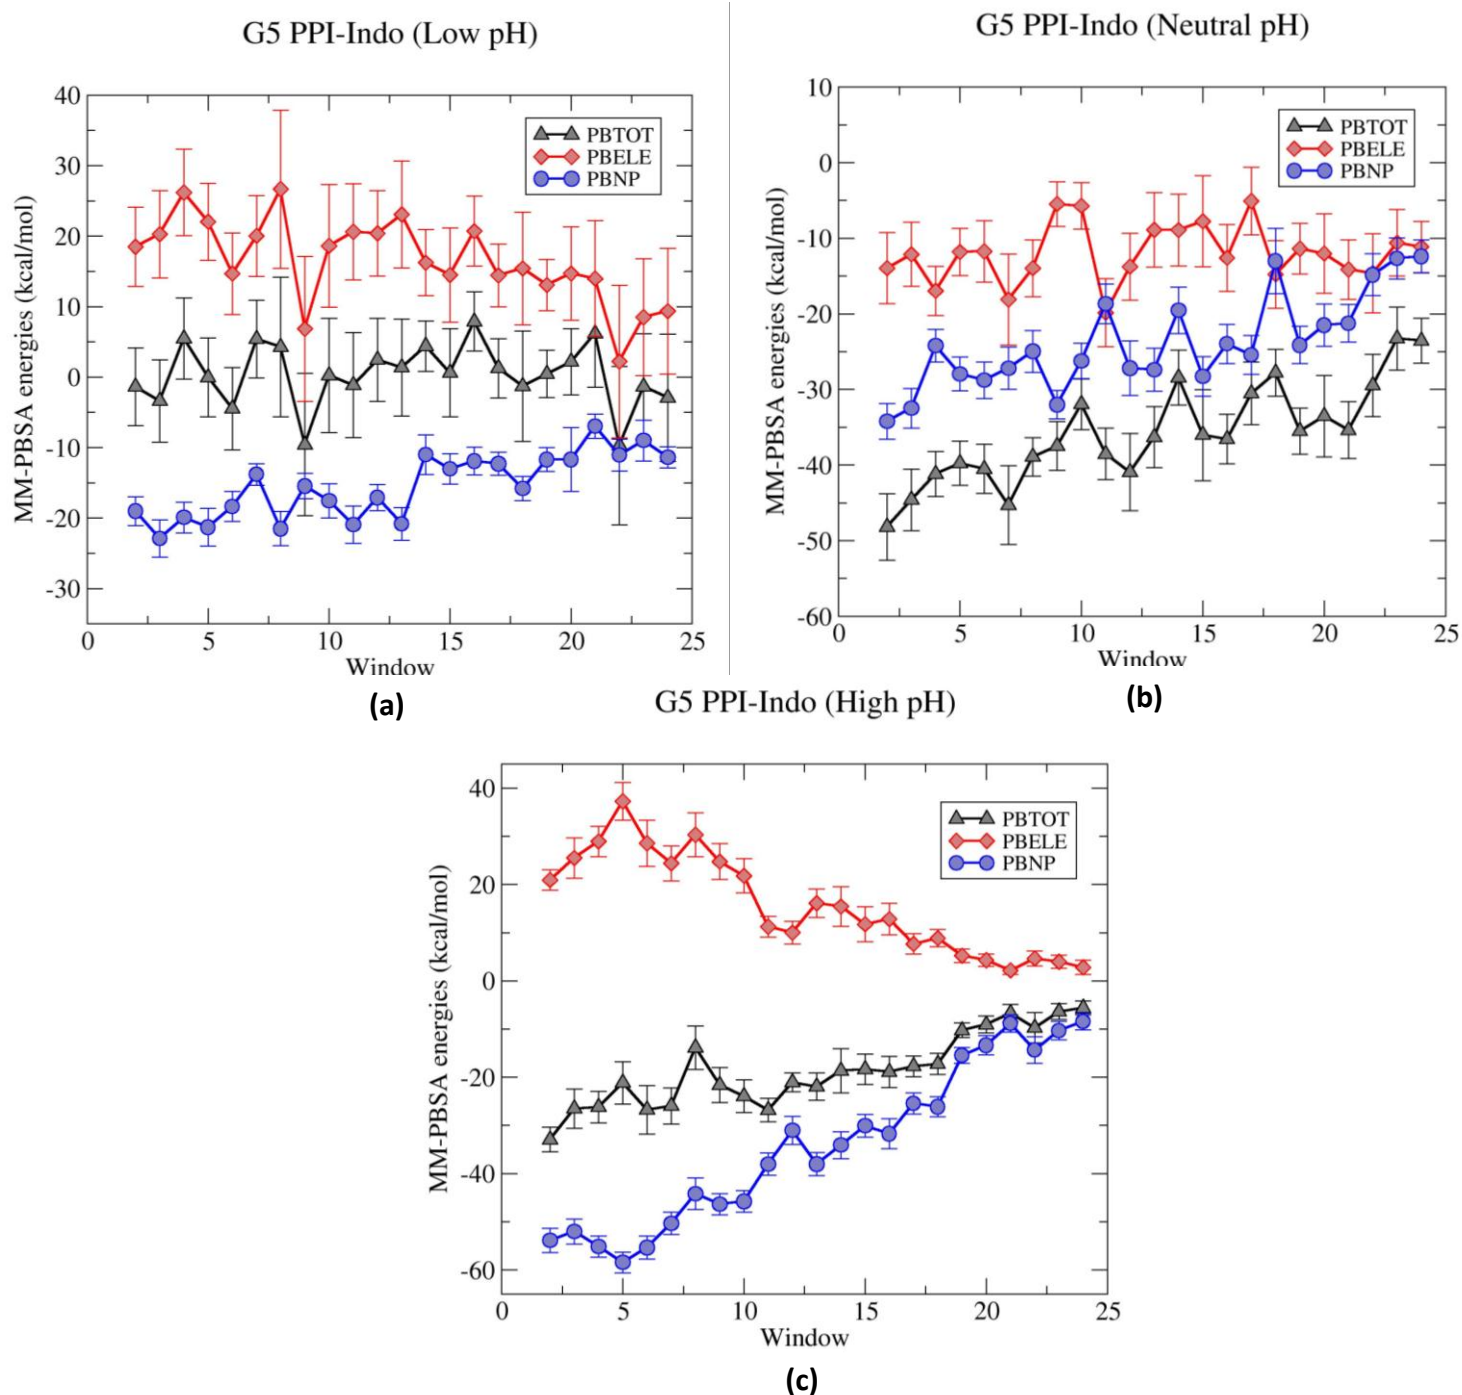

**Figure S9.** Plots (with Std. Dev. bars) showing different energy components of MM-PBSA for G5 PPI<sup>EDA</sup>-Indo complex at (a) low pH, (b) neutral pH and (c) high pH. **PBTOT** = **PBELE** + **PBNP**. *Abbreviations:* PBTOT = Final estimated binding free energy, PBELE = Electrostatic solvation free energy (PBCAL) + MM electrostatic energy (ELE), PBNP = nonpolar solvation free energy (PBSUR) + MM van der Waals energy (VDW).



## S2.5. Hydrogen bond analysis between drug Indo and G5 PPI<sup>EDA</sup> dendrimer

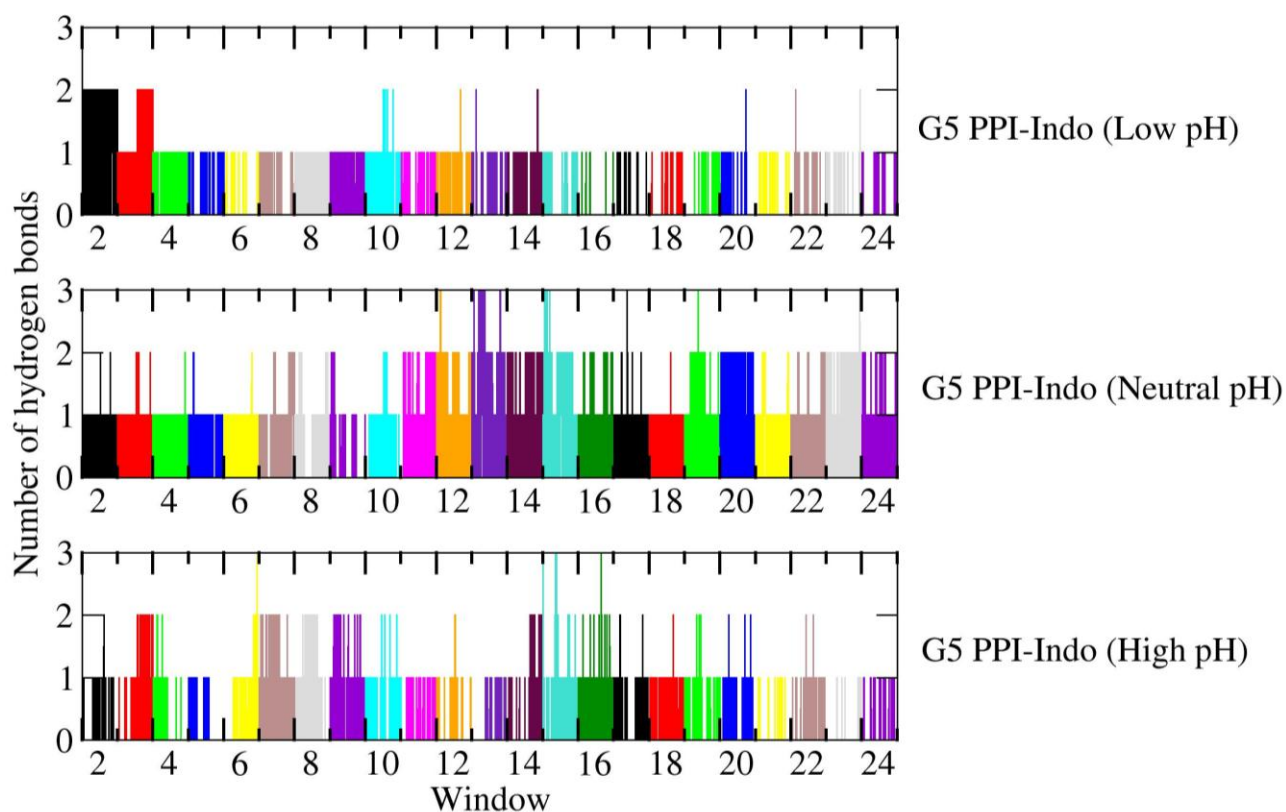

**Figure S10.** Plots showing hydrogen bonds formation ability of drug molecule Indo (carboxylic, methoxy and carbonyl groups) with the G5 PPI<sup>EDA</sup> dendrimer (primary and tertiary amino groups) at low, neutral and high pH conditions. X axis represents the umbrella sampling window (each 1ns simulation run and hydrogen bonds were calculated on each snapshot after 1ps). For calculating hydrogen bonds, angle and distance cutoff was set to 120° and 3.0 Å respectively.

## S2.6. Radius of gyration for drug loaded dendrimers

To identify the conformational changes in dendrimer after drug loading, Radius of gyration ( $R_g$ ) of the G5 PPI<sup>EDA</sup> dendrimer (with Famo and Indo) at all the three pH conditions (Figure S11a) as well as G3 PAMAM and G4 PPI<sup>DAB</sup> dendrimers (with Pbz) (Figure S11b) at neutral pH conditions were analyzed for all the umbrella sampling windows.

In case of Famo and Indo loaded G5 PPI<sup>EDA</sup> dendrimer at low and neutral pH conditions (Figure S11a),  $R_g$  values were found to be consistent and almost close to the  $R_g$  values of the drug unloaded equilibrated dendrimer (Low pH – 16.29 Å, Neutral pH – 15.77 Å). This is because, protonation of primary and tertiary amines causes electrostatic repulsions which resulted in swelling of the dendrimer, and in such “open” structures the size of inner cavities are large enough to host the drug molecules easily. In contrary, at high pH where the structure is quite compact the  $R_g$  values of drug loaded G5 PPI<sup>EDA</sup> dendrimer deviates to some extent from the  $R_g$  values of the drug unloaded equilibrated dendrimer (High pH – 12.73 Å). In detail, two different trends of deviation were observed at high pH, in case of Famo loaded G5 PPI<sup>EDA</sup> dendrimer  $R_g$  values slightly decreases, while in case of Indo loaded G5 PPI<sup>EDA</sup> dendrimer  $R_g$  values slightly increases (Figure S11a). The reason being, Famo is more flexible as compared to Indo (in terms of number of rotatable bonds), thus Famo can adopt various conformation which can be easily encapsulated in the compact structure of dendrimer. Another reason could also be attributed to intermolecular hydrogen bonding i.e. in an attempt to maximize the hydrogen bonding between Famo and atoms of the dendrimer the overall  $R_g$  slightly decreases. Intermolecular hydrogen bonding analysis of G5 PPI<sup>EDA</sup>-Famo complex (Figure 8, *main manuscript*) also showed that these interactions are more at high pH. On the other hand, when Indo is pushed inside the G5

PPI<sup>EDA</sup> dendrimer because of the bigger size and higher rigidity of Indo in comparison to Famo, slight increase in overall  $R_g$  of the dendrimer was observed. Accordingly, Indo faces larger free energy barrier as compared to Famo in G5 PPI<sup>EDA</sup> dendrimer at high pH conditions.

In case of G3 PAMAM-Pbz and G4 PPI<sup>DAB</sup>-Pbz complexes at neutral pH, no significant change in the  $R_g$  was observed for the dendrimers when compared with the  $R_g$  value of drug unloaded equilibrated dendrimers (G3 PAMAM – 15.78 Å, G4 PPI<sup>DAB</sup> – 12.97 Å). Here also, the same swelling concept and large size of the internal cavities at neutral pH are responsible for the easy encapsulation of Pbz in G3 PAMAM and G4 PPI<sup>DAB</sup>, without much change in the dendrimers conformation.

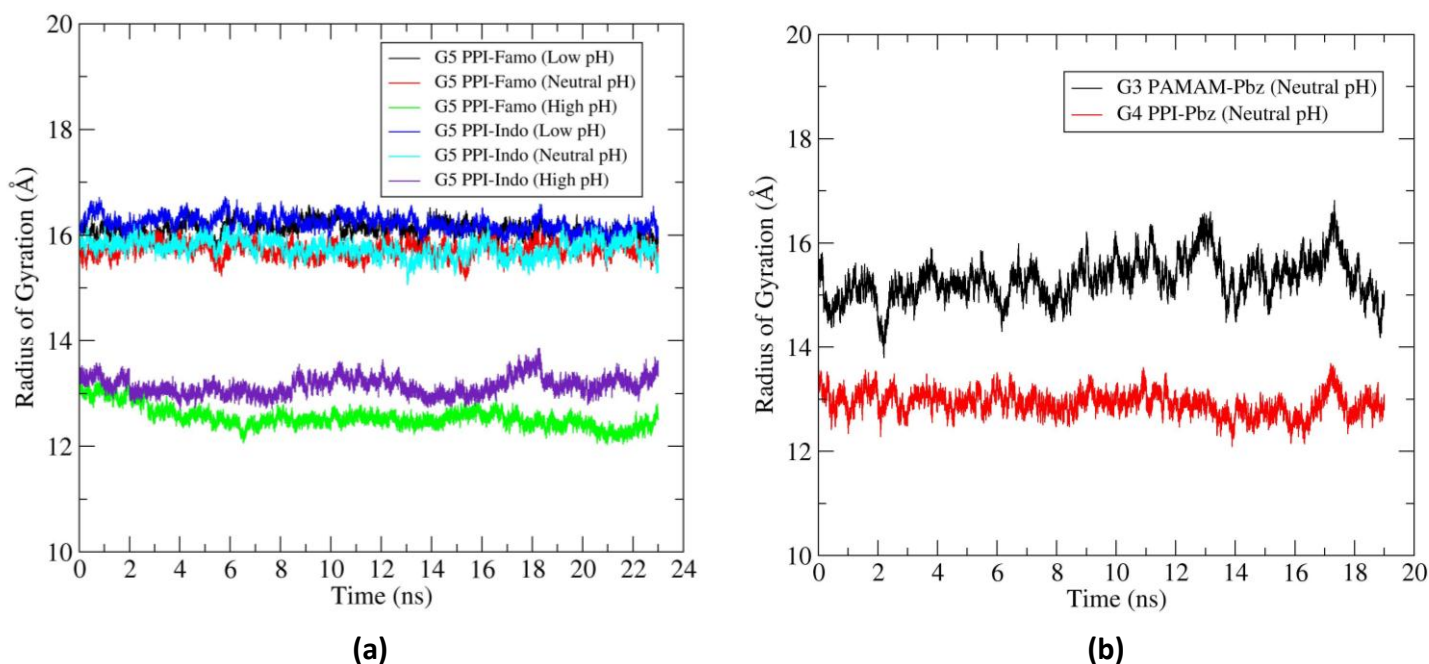

**Figure S11.** Time evolution of Radius of Gyration ( $R_g$ ) of the drug loaded dendrimer for the complete umbrella sampling windows (each snapshot being saved at 1 ps). **(a)** G5 PPI<sup>EDA</sup>-Famo and G5 PPI<sup>EDA</sup>-Indo complexes at low, neutral and high pH conditions. **(b)** G3 PAMAM-Pbz and G4 PPI<sup>DAB</sup>-Pbz complexes at neutral pH condition.

## References

1. V. Maingi, V. Jain, P. V. Bharatam and P. K. Maiti, *J. Comput. Chem.*, 2012, **33**, 1997–2011. <http://www.physics.iisc.ernet.in/~maiti/dbt/home.html>.
2. D. A. Case, T. A. Darden, T. E. Cheatham III, C. L. Simmerling, J. Wang, R. E. Duke, R. Luo, M. Crowley, R. C. Walker, W. Zhang, K. M. Merz, B. Wang, S. Hayik, A. Roitberg, G. Seabra, I. Kolossváry, K. F. Wong, F. Paesani, X. Wu, S. Brozell, T. Steinbrecher, H. Gohlke, L. Yang, C. Tan, J. Mongan, V. Hornack, G. Cui, D. H. Mathews, M. G. Seetin, C. Sagui, V. Babin and P. A. Kollman, University of California, San Francisco, 2008.
3. M. Frisch, G. Trucks, H. Schlegel, G. Scuseria, M. Robb, J. Cheeseman, G. Scalmani, V. Barone, B. Mennucci, G. Petersson and H. Nakatsuji, Gaussian, Inc., Wallingford CT, 2010.
4. C. I. Bayly, P. Cieplak, W. Cornell and P. A. Kollman, *J. Phys. Chem.*, 1993, **97**, 10269–10280.
5. F. H. Allen, *Acta Crystallogr. Sect. B: Struct. Sci.*, 2002, **58**, 380–388.
6. R. G. Parr and W. Yang, *Density-functional theory of atoms and molecules*, Oxford University Press, USA, 1994.
7. M. Cossi, G. Scalmani, N. Rega and V. Barone, *J. Chem. Phys.*, 2002, **117**, 43–54.
8. D. S. Goodsell, G. M. Morris and A. J. Olson, *J. Mol. Recognit.*, 1996, **9**, 1–5.
9. G. M. Morris, D. S. Goodsell, R. S. Halliday, R. Huey, W. E. Hart, R. K. Belew and A. J. Olson, *J. Comput. Chem.*, 1998, **19**, 1639–1662.
10. M. F. Sanner, A. J. Olson and J. C. Spehner, *Biopolymers*, 1996, **38**, 305–320.
11. T. Ishida, Y. In, M. Shibata, M. Doi, M. Inoue and I. Yanagisawa, *Mol. Pharmacol.*, 1987, **31**, 410–416.
12. C. Olea-Azar and J. Parra-Mouchet, *J. Mol. Struc.-THEOCHEM*, 1997, **390**, 239–245.
13. A. Marosi, Z. Szalay, S. Beni, Z. Szakacs, T. Gati, A. Racz, B. Noszal and A. Demeter, *Anal. Bioanal. Chem.*, 2012, **402**, 1653–1666.
